# Supplementary material for: Efficient isolation of rare B cells using next-generation antigen barcoding
Source: PubMed Central journal article supplement (PMC10036767; doi:10.3389/fcimb.2022.962945), 2023-03-10

## *Supplementary Material*

### 1 Supplementary Tables

**Supplementary Table 1.** Barcoded oligonucleotides for AgBC construction.

| <b>name</b> | <b>barcode</b>  |
|-------------|-----------------|
| AgBC1       | TAGGCGTCGATGCCG |
| AgBC2       | ACCGATACTCGACAT |
| AgBC3       | TGTCGACATCGCCCC |
| AgBC4       | TCCCCGGCAGTAGAA |
| AgBC5       | CGGTAGGATCCACGC |
| AgBC6       | GTCACAAGTGACATC |
| AgBC7       | GATGCGCACGAACCG |
| AgBC8       | CTAAAGGTTTATATC |
| AgBC9       | GCTAGTTCGGCTTAT |
| AgBC10      | TTACCCTAGACAAGC |

**Supplementary Table 2.** Preparation of baits based on molecular weight.

|                         | <b>BG505 SOSIP</b> | <b>eOD-GT8.1</b> |
|-------------------------|--------------------|------------------|
| bait concentration      | 200 nM             | 200 nM           |
| molar ratio of bait:SAV | 2:1                | 4:1              |
| bait molecular weight   | 225 kD             | 22 kD            |

**Supplementary Table 3.** Cell staining master mix (by species).

| specificity | mouse       | human       |
|-------------|-------------|-------------|
| CD3e        | -           | APC-Cy7     |
| CD4         | APC-Cy7     | APC-Cy7     |
| CD8a        | APC-Cy7     | APC-Cy7     |
| Ly6C        | APC-Cy7     | -           |
| CD11c       | APC-Cy7     | -           |
| CD14        | -           | APC-Cy7     |
| F4/80       | APC-Cy7     | -           |
| CD19        | PE          | PerCP-Cy5.5 |
| IgD         | PerCP-Cy5.5 | -           |
| IgM         | BV786       | PE          |
| IgG         | -           | BV786       |

## 2 Supplementary Figures

**Supplementary Figure 1. Genes distinguishing naïve, memory and atypical B cell subsets.** Plot was created in scanpy using `scanpy.pl.dotplot()`.

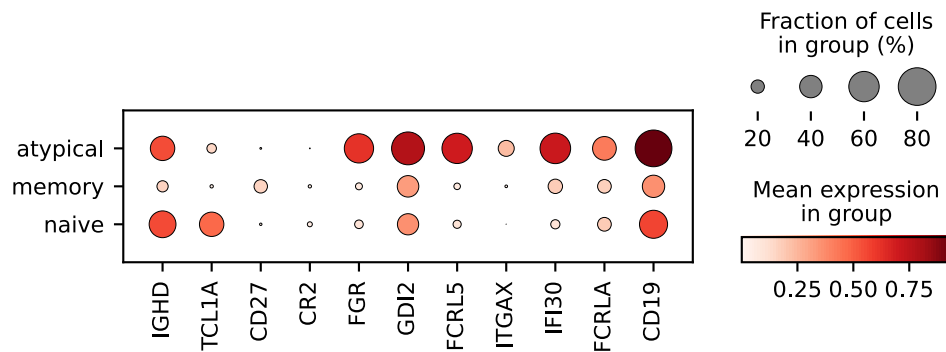

Supplement: DataSheet_1.pdf [file DataSheet_1.pdf]
